# Supplementary material for: Second-Generation Polyamidoamine Dendrimer Conjugated with Oligopeptides Can Enhance Plasmid DNA Delivery In Vitro
Source: MDPI journal article supplement (doi:10.3390/molecules28227644), 2023-11-17
Supplement: s1 [file s1]

Article

# Second-Generation Polyamidoamine Dendrimer Conjugated with Oligopeptides Can Enhance Plasmid DNA Delivery In Vitro

Seongyeon Kim †, Le Thi Thuy †, Jeil Lee and Joon Sig Choi \*

Department of Biochemistry, Chungnam National University, 99 Daehak-ro, Yuseong-gu, Daejeon 34134, Republic of Korea; sykim96500@gmail.com (S.K.); ltthuy1990@gmail.com (L.T.T.); jeillee@hongik.ac.kr (J.L.)

\* Correspondence: joonsig@cnu.ac.kr; Tel.: +82-42-821-7528; Fax: +82-42-822-7548

† These authors contributed equally to this work.

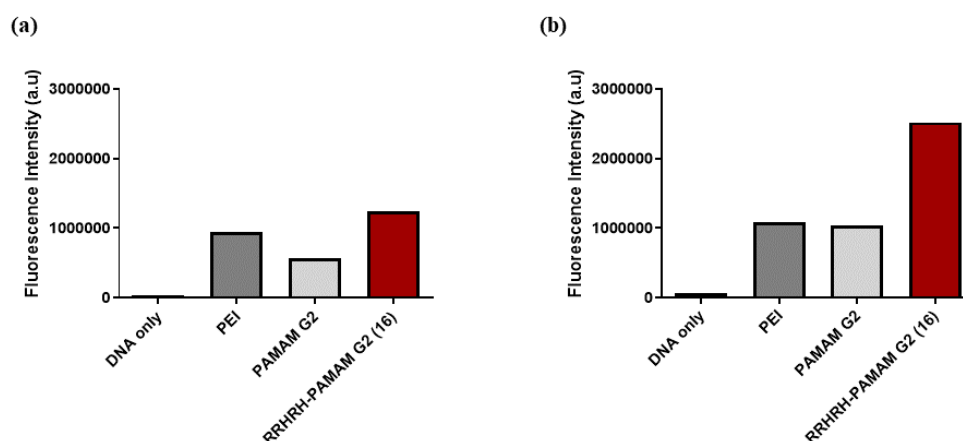

Figure S1. Fluorescence intensity of Alexa 546 with polyplex treatment for 12 h (a) and 24 h (b) in NIH3T3 cells

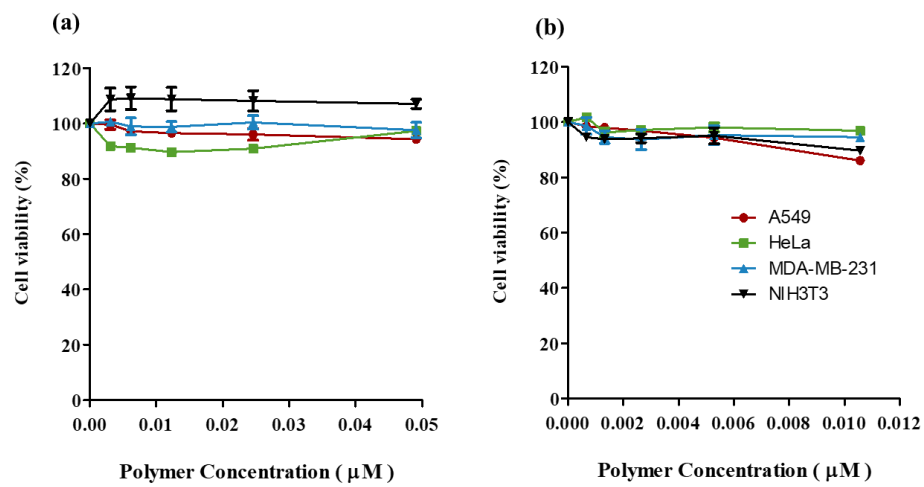

**Figure S2.** Cell viability of PAMAM G2 (a) and RRHRH-PAMAM G2 (b) in A549, HeLa, MDA-MB-231 and NIH3T3 cells for 24 h.
